# Supplementary material for: Native Amazonian Canga Grasses Show Distinct Nitrogen Growth Responses in Iron Mining Substrates
Source: MDPI journal article supplement (doi:10.3390/plants10050849), 2021-04-22
Supplement: s1 [file s1]

**Manuscript title:** Native Amazonian *canga* grasses show distinct nitrogen growth responses in iron mining substrates

**Authors:** Cecilio F. Caldeira, Madson O. Lima, Silvio J. Ramos, Markus Gastauer

**Author affiliations:** Instituto Tecnológico Vale, Rua Boaventura da Silva 955, CEP 66055-090, Belém, Pará, Brazil

**\*Corresponding author:** [cecilio.caldeira@itv.org](mailto:cecilio.caldeira@itv.org), Instituto Tecnológico Vale. Boaventura da Silva, 955. Belém/PA, Brazil.

TABLES

**Table S1.** Chemical and physical properties of the red mining waste substrate collected from a representative location of the S11D Eliezer Batista Complex, Canaã dos Carajás, Pará/Brazil.

|     |     |                     |      |     |      |     |     |      |     |     |                        |      |      |      |      |      |
|-----|-----|---------------------|------|-----|------|-----|-----|------|-----|-----|------------------------|------|------|------|------|------|
| pH  | OC  | N                   | P    | K   | S    | B   | Zn  | Fe   | Mn  | Cu  | Ca                     | Mg   | Al   | Sand | Clay | Silt |
|     | %   | mg dm <sup>-3</sup> |      |     |      |     |     |      |     |     | cmolc dm <sup>-3</sup> |      |      | %    |      |      |
| 5.1 | 0.4 | <0.1                | 14.8 | 8.1 | 92.5 | 0.2 | 1.7 | 76.2 | 5.5 | 0.4 | 0.20                   | 0.10 | <0.1 | 39.3 | 16.7 | 44.0 |

**Table S2.** The regression parameters of 37 variables measured in the plants of *Paspalum cinerascens* cultivated in mining waste substrate in response to nitrogen addition.

| Species               | Variable                                                                             | Intercept | x       | x <sup>0.5</sup> | r <sup>2</sup> | p.value |
|-----------------------|--------------------------------------------------------------------------------------|-----------|---------|------------------|----------------|---------|
| <i>P. cinerascens</i> | Tillering rate (tiller plant <sup>-1</sup> )                                         | 3.8410    | -0.0375 | 1.2333           | 0.6601         | 6.1E-08 |
|                       | Plant dry mass (g)                                                                   | 7.2975    | -0.0855 | 2.1523           | 0.7829         | 9.0E-11 |
|                       | Root: shoot ratio (g g <sup>-1</sup> )                                               | 1.0289    | 0.0041  | -0.0859          | 0.3563         | 6.4E-04 |
|                       | A - carbon assimilation (μmolCO <sub>2</sub> m <sup>-2</sup> s <sup>-1</sup> )       | 10.5460   | -0.0737 | 1.8827           | 0.7246         | 2.2E-16 |
|                       | gs - stomatal conductance (molH <sub>2</sub> O m <sup>-2</sup> s <sup>-1</sup> )     | 0.1232    | -0.0007 | 0.0171           | 0.7475         | 2.2E-16 |
|                       | WUE - water use efficiency (μmolCO <sub>2</sub> mmolH <sub>2</sub> O <sup>-1</sup> ) | 4.1605    | -0.0101 | 0.2291           | 0.3824         | 2.2E-16 |
|                       | Chlorophyl a (mg g <sup>-1</sup> FW)                                                 | 4.0679    | 0.0177  | -                | 0.5017         | 6.5E-05 |
|                       | Chlorophyl b (mg g <sup>-1</sup> FW)                                                 | 2.5033    | 0.0135  | -                | 0.6777         | 4.7E-07 |
|                       | Carotenoids (mg g <sup>-1</sup> FW)                                                  | 1.5037    | 0.0048  | -                | 0.4446         | 2.2E-04 |
|                       | N shoot (g kg <sup>-1</sup> )                                                        | 4.7112    | -0.0334 | 0.5969           | 0.4166         | 2.2E-16 |
|                       | N root (g kg <sup>-1</sup> )                                                         | 4.4092    | -0.0265 | 0.4059           | 0.2923         | 6.3E-04 |
|                       | P shoot (g kg <sup>-1</sup> )                                                        | 0.6358    | -0.0001 | -                | -0.0054        | 6.2E-01 |
|                       | P root (g kg <sup>-1</sup> )                                                         | 0.4890    | 0.0003  | -                | 0.0088         | 2.5E-01 |
|                       | K shoot (g kg <sup>-1</sup> )                                                        | 10.0548   | -0.0195 | -                | 0.5369         | 2.2E-16 |
|                       | K root (g kg <sup>-1</sup> )                                                         | 8.0553    | -0.0138 | -                | 0.2257         | 1.1E-03 |
|                       | Ca shoot (g kg <sup>-1</sup> )                                                       | 2.2360    | -0.0022 | -                | 0.0974         | 1.1E-04 |
|                       | Ca root (g kg <sup>-1</sup> )                                                        | 1.5192    | -0.0069 | 0.0857           | 0.1607         | 1.5E-02 |
|                       | Mg shoot (g kg <sup>-1</sup> )                                                       | 1.0245    | -0.0083 | 0.1723           | 0.2843         | 4.9E-11 |
|                       | Mg root (g kg <sup>-1</sup> )                                                        | 1.2799    | -0.0094 | 0.1562           | 0.2561         | 1.6E-03 |
|                       | S shoot (g kg <sup>-1</sup> )                                                        | 3.5299    | 0.0096  | -0.2952          | 0.7768         | 2.2E-16 |
|                       | S root (g kg <sup>-1</sup> )                                                         | 2.1386    | 0.0040  | -                | 0.3406         | 4.6E-05 |
|                       | B shoot (mg kg <sup>-1</sup> )                                                       | 11.0089   | 0.0082  | -0.3289          | 0.1548         | 4.0E-06 |
|                       | B root (mg kg <sup>-1</sup> )                                                        | 8.1800    | 0.0464  | 0.9599           | 0.5088         | 7.3E-07 |
|                       | Cu shoot (mg kg <sup>-1</sup> )                                                      | 7.0579    | 0.0977  | -0.7792          | 0.5511         | 2.2E-16 |
|                       | Cu root (mg kg <sup>-1</sup> )                                                       | 9.3160    | 0.0274  | -                | 0.1838         | 3.4E-03 |
|                       | Fe shoot (mg kg <sup>-1</sup> )                                                      | 0.2550    | 0.0001  | -0.0090          | 0.1550         | 3.9E-06 |
|                       | Fe root (mg kg <sup>-1</sup> )                                                       | 18.1      | 0.1024  | -1.4347          | 0.3303         | 2.3E-04 |
|                       | Mn shoot (mg kg <sup>-1</sup> )                                                      | 0.1595    | 0.0002  | -0.0059          | 0.1555         | 3.8E-06 |
|                       | Mn root (mg kg <sup>-1</sup> )                                                       | 0.0947    | 0.0006  | -0.0087          | 0.1696         | 1.2E-02 |
|                       | Zn shoot (mg kg <sup>-1</sup> )                                                      | 29.0025   | -0.0869 | 0.7495           | 0.0983         | 3.2E-04 |
|                       | Zn root (mg kg <sup>-1</sup> )                                                       | 22.8319   | -0.1196 | 1.8137           | 0.1080         | 4.6E-02 |
|                       | Stomatal frequence - adaxial                                                         | 10.0924   | 0.0088  | -                | -0.0407        | 6.5E-01 |
|                       | Stomatal frequence - abaxial                                                         | 106.2524  | -0.2065 | -                | 0.3673         | 1.7E-03 |
|                       | Stomatal length - adaxial                                                            | 29.8621   | 0.0271  | -                | 0.3787         | 0.0014  |
|                       | Stomatal width - adaxial                                                             | 23.2206   | 0.0231  | -                | 0.5230         | 8.6E-05 |
|                       | Stomatal length - abaxial                                                            | 23.6545   | 0.0495  | -                | 0.4457         | 4.1E-04 |
|                       | Stomatal width - abaxial                                                             | 16.4847   | 0.0116  | -                | 0.2854         | 6.1E-03 |

**Table S3.** The regression parameters of 26 variables measured in the plants of *Axonopus longispicus* cultivated in mining waste substrate in response to nitrogen addition.

| Species        | Variable                                                                             | Intercept | x       | x <sup>0.5</sup> | r <sup>2</sup> | p.value |
|----------------|--------------------------------------------------------------------------------------|-----------|---------|------------------|----------------|---------|
| A. longispicus | Tillering rate (tiller plant <sup>-1</sup> )                                         | 5.4200    | 0.0399  | -                | 0.3025         | 6.5E-04 |
|                | Plant dry mass (g)                                                                   | 2.4204    | 0.0013  | -                | 0.0239         | 6.0E-01 |
|                | Root: shoot ratio (g g <sup>-1</sup> )                                               | 0.2663    | -0.0005 | -                | -0.0327        | 8.9E-01 |
|                | A - carbon assimilation (μmolCO <sub>2</sub> m <sup>-2</sup> s <sup>-1</sup> )       | 9.9732    | 0.0055  | -                | 0.0174         | 4.3E-02 |
|                | gs - stomatal conductance (molH <sub>2</sub> O m <sup>-2</sup> s <sup>-1</sup> )     | 0.1009    | 0.0001  | -                | 0.0604         | 5.1E-04 |
|                | WUE - water use efficiency (μmolCO <sub>2</sub> mmolH <sub>2</sub> O <sup>-1</sup> ) | 4.7480    | -0.0013 | -                | 0.0017         | 2.6E-01 |
|                | Chlorophyl a (mg g <sup>-1</sup> FW)                                                 | 2.3185    | 0.0052  | -                | -0.0074        | 3.7E-01 |
|                | Chlorophyl b (mg g <sup>-1</sup> FW)                                                 | 1.8453    | 0.0023  | -                | -0.0334        | 5.8E-01 |
|                | Carotenoids (mg g <sup>-1</sup> FW)                                                  | 0.7991    | 0.0051  | -                | 0.1264         | 5.8E-02 |
|                | N shoot (g kg <sup>-1</sup> )                                                        | 8.9435    | 0.0177  | -                | 0.2746         | 2.2E-11 |
|                | P shoot (g kg <sup>-1</sup> )                                                        | 0.4882    | 0.0014  | -                | 0.1666         | 3.6E-07 |
|                | K shoot (g kg <sup>-1</sup> )                                                        | 8.4459    | 0.0141  | -                | 0.1564         | 8.6E-07 |
|                | Ca shoot (g kg <sup>-1</sup> )                                                       | 1.8117    | 0.0021  | -                | 0.2557         | 1.3E-10 |
|                | Mg shoot (g kg <sup>-1</sup> )                                                       | 2.0938    | 0.0015  | -                | 0.0822         | 3.7E-04 |
|                | S shoot (g kg <sup>-1</sup> )                                                        | 2.7010    | 0.0051  | -                | 0.1509         | 1.4E-09 |
|                | B shoot (mg kg <sup>-1</sup> )                                                       | 8.8717    | 0.0095  | -                | 0.0817         | 3.8E-03 |
|                | Cu shoot (mg kg <sup>-1</sup> )                                                      | 10.0545   | 0.1828  | -1.6700          | 0.7677         | 2.2E-16 |
|                | Fe shoot (mg kg <sup>-1</sup> )                                                      | 0.4973    | -0.0008 | -                | 0.0641         | 1.5E-03 |
|                | Mn shoot (mg kg <sup>-1</sup> )                                                      | 0.2946    | -0.0022 | 0.0376           | 0.3139         | 2.8E-12 |
|                | Zn shoot (mg kg <sup>-1</sup> )                                                      | 29.3572   | -0.0722 | 1.4001           | 0.2658         | 2.8E-10 |
|                | Stomatal frequence - adaxial                                                         | 88.2948   | 0.0179  | -                | -0.0505        | 7.7E-01 |
|                | Stomatal frequence - abaxial                                                         | 91.9995   | -0.1171 | -                | 0.4954         | 3.2E-04 |
|                | Stomatal length - adaxial                                                            | 32.059    | -0.007  | -                | 0.022          | 2.5E-01 |
|                | Stomatal width - adaxial                                                             | 18.121    | -0.004  | -                | 0.016          | 2.7E-01 |
|                | Stomatal length - abaxial                                                            | 34.043    | 0.001   | -                | -0.053         | 8.5E-01 |
|                | Stomatal width - abaxial                                                             | 19.250    | 0.000   | -                | -0.055         | 9.4E-01 |

FIGURES

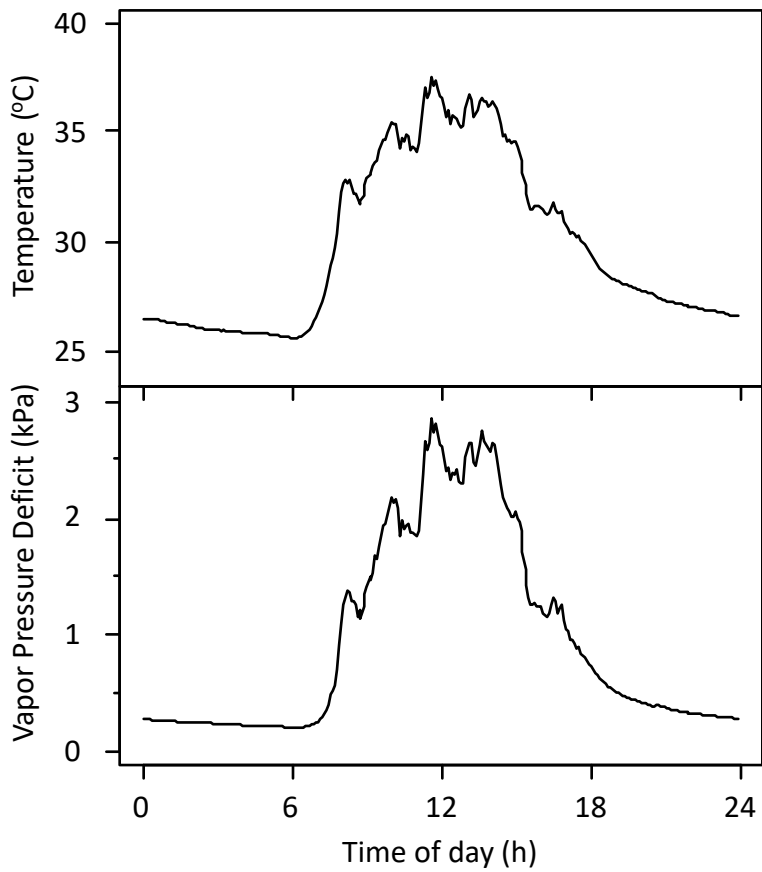

**Figure S1.** Mean air temperature and vapor pressure deficit inside the greenhouse during the 110 days of plants growing.



FIGURES

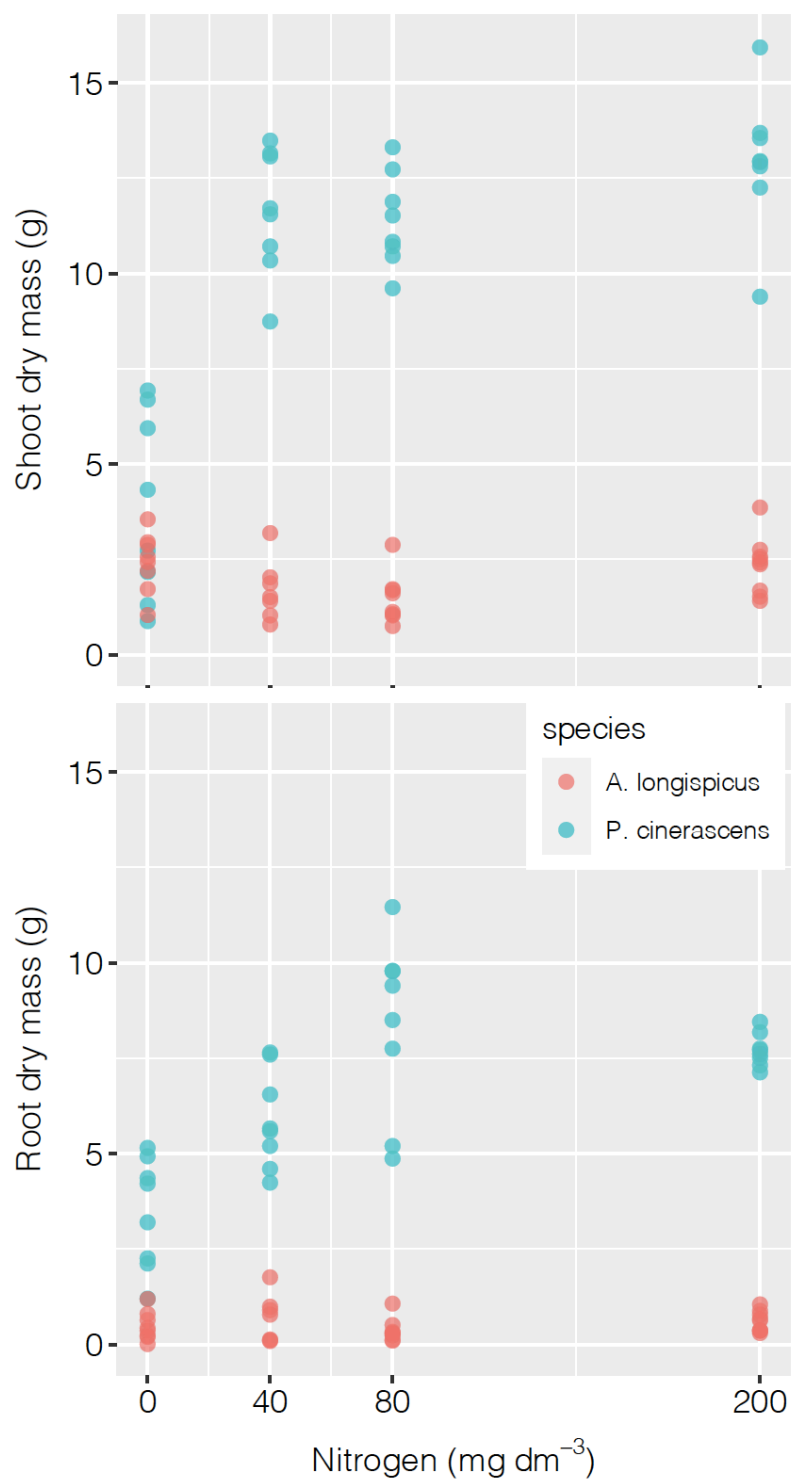

**Figure S2.** Nitrogen growth response of two native grass species from *canga* in Serra dos Carajás (eastern Amazon) grown in mining waste substrate. The shoot and root plant dry mass of *Paspalum cinerascens* (blue) and *Axonopus longispicus* (red) are shown.

FIGURES

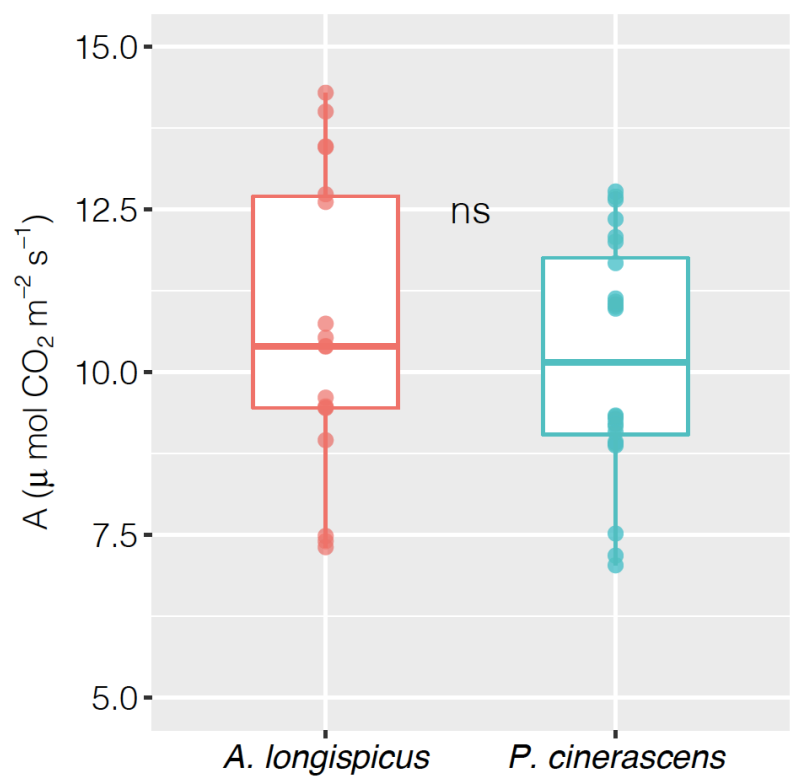

**Figure S3.** Boxplots of the carbon assimilation rates of two native grass species (*Paspalum cinerascens* (blue) and *Axonopus longispicus* (red)) from *canga* in Serra dos Carajás (eastern Amazon) growing in the mining waste substrates without nitrogen addition (control treatment).

FIGURES

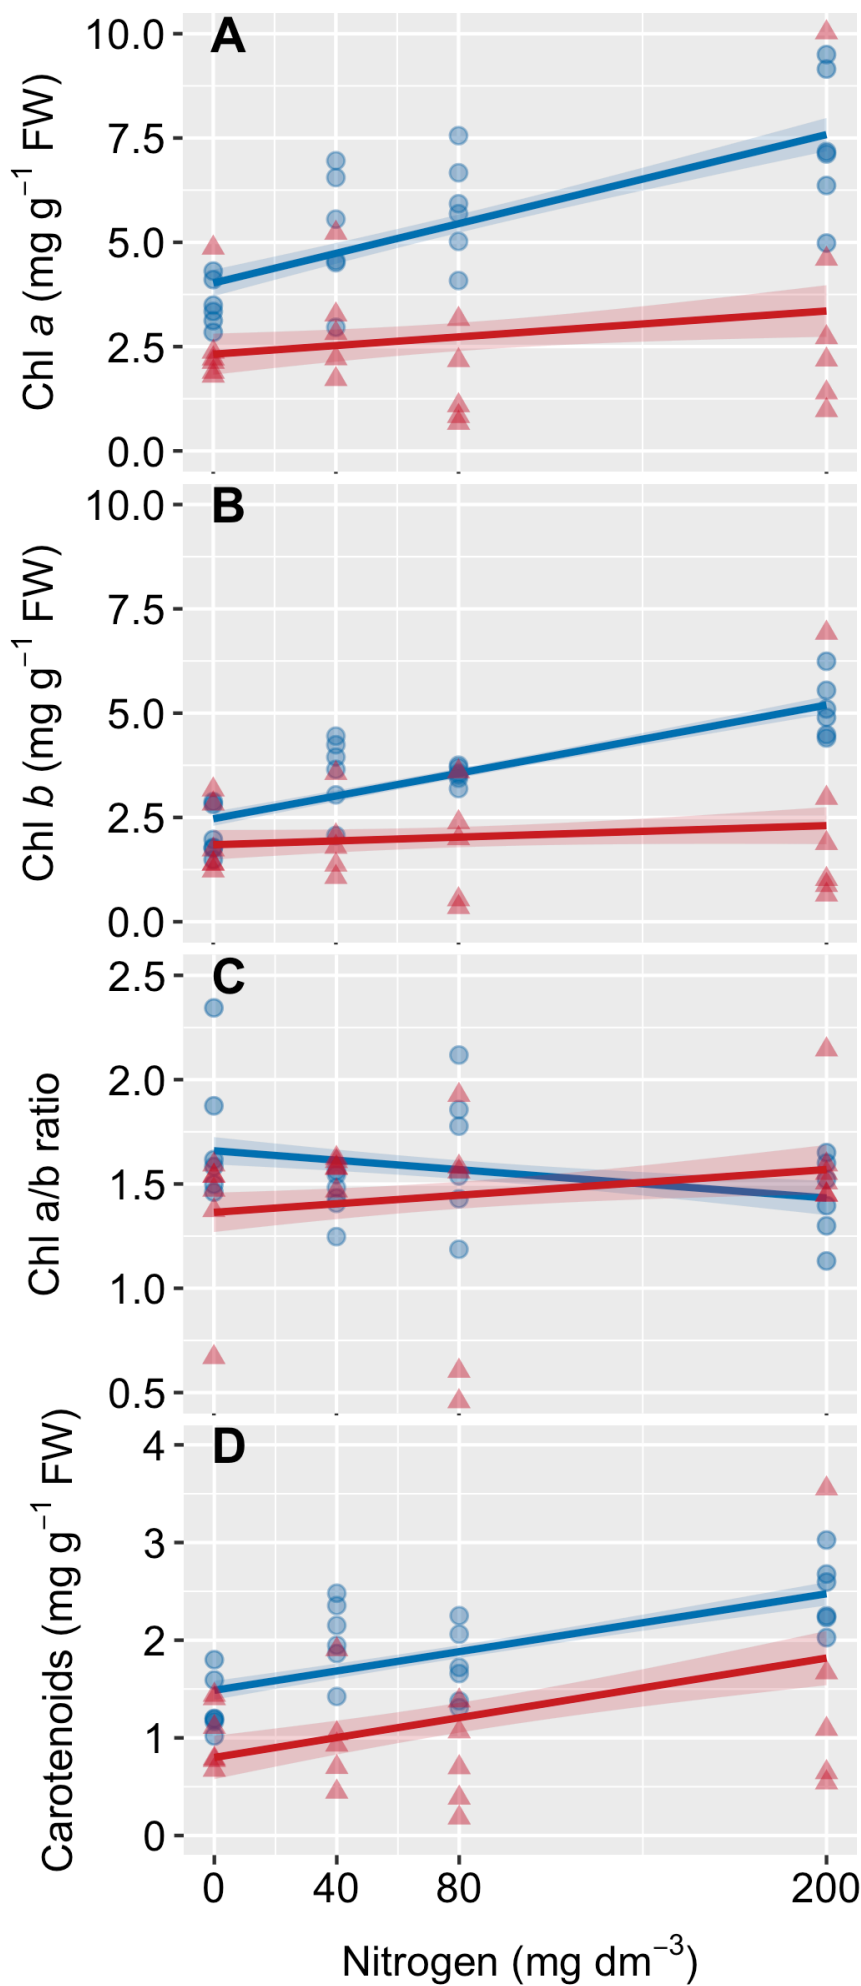

**Figure S4.** Effects of nitrogen increment to mining waste substrate in the pigment contents of two native grass species from canga of Carajás (eastern Amazon). Chlorophyll *a* (A), chlorophyll *b* (B), the ratio between chlorophyll *a/b* (C), and carotenoids (D) from fresh leaf tissue of *Paspalum cinerascens* (circles, blue) and *Axonopus longispicus* (triangles, red). Lines correspond to best fitted model and shaded area to its confidence intervals. Regression parameters are shown in the Supplemental Tables S2 and S3.



FIGURES

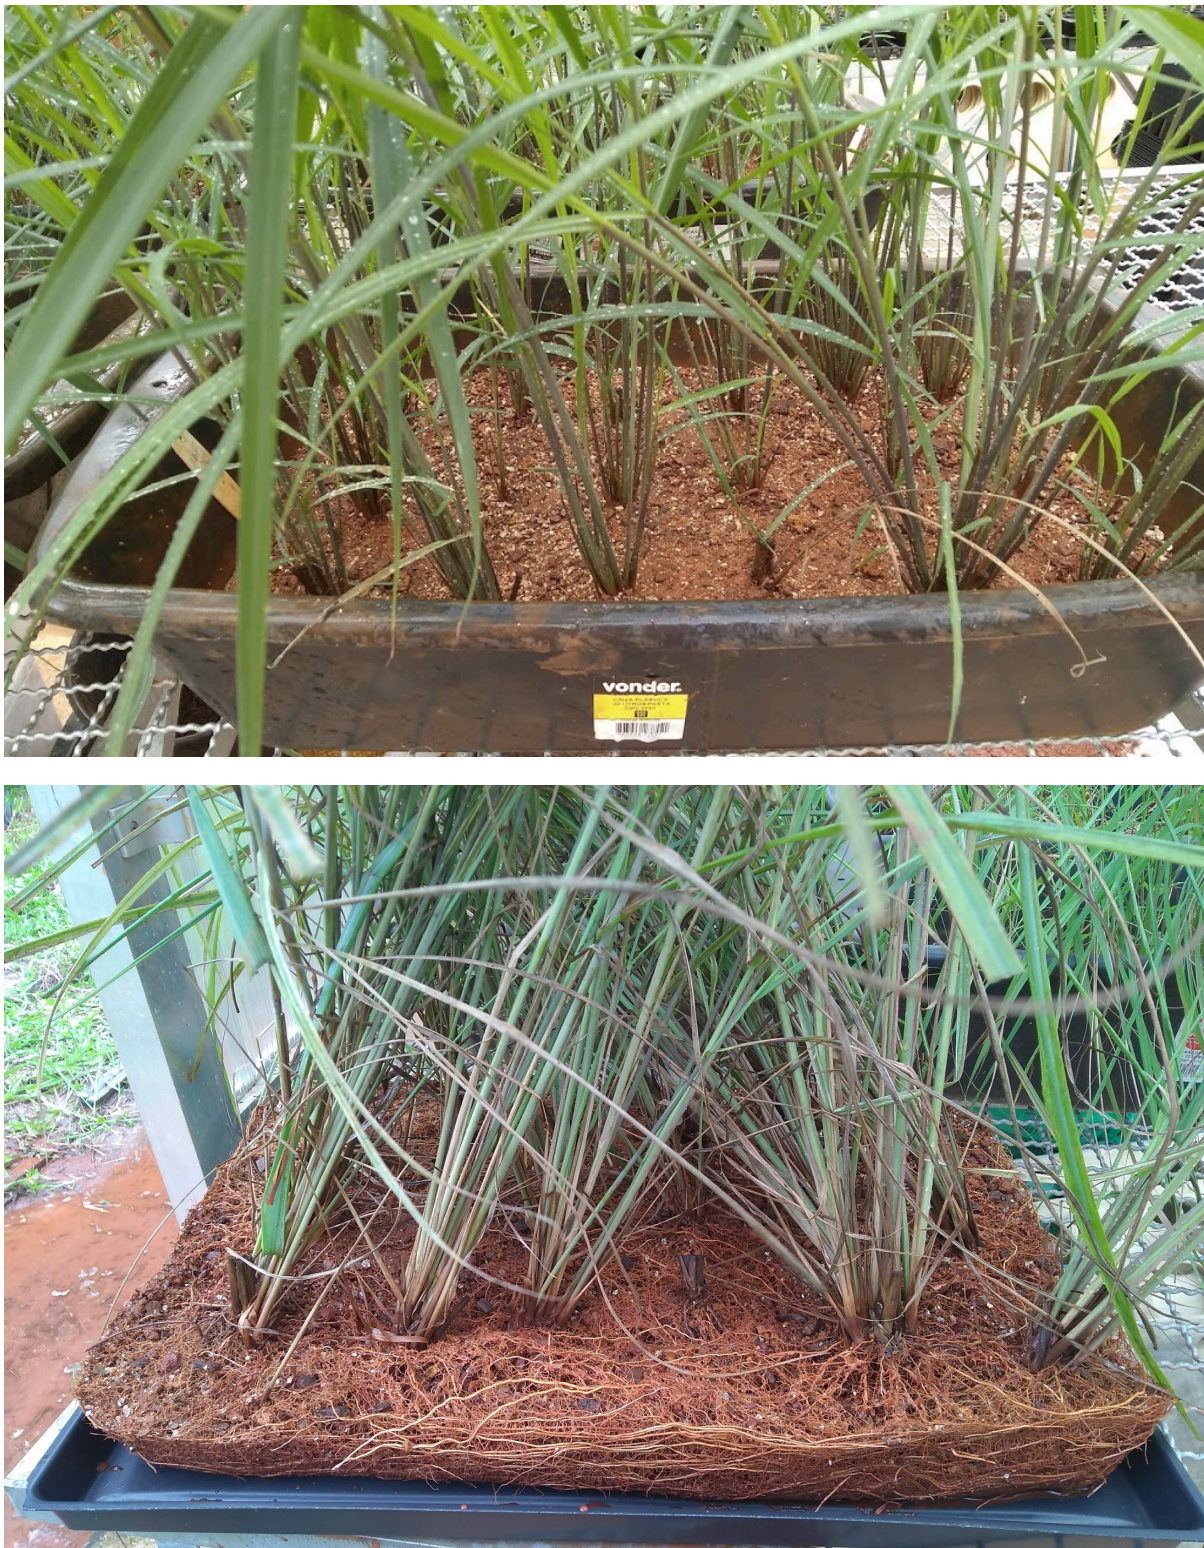

**Figure S5.** Plants of *Paspalum cinerascens* cultivated in a nutrient-rich substrate (a mixture of loam soil, organic matter, sand and fertilizer) under greenhouse conditions. Images captured from (A) plants three month-old, and (B) five month-old.
